# Supplementary material for: The Conservation Genetics of Iris lacustris (Dwarf Lake Iris), a Great Lakes Endemic
Source: MDPI journal article supplement (doi:10.3390/plants12132557), 2023-07-05
Supplement: s1 [file s1]

Supplemental Table S1. AMOVA results for all datasets.

|                              |     |           |           |            |            |         |        |
|------------------------------|-----|-----------|-----------|------------|------------|---------|--------|
| MCR90 24 populations         | Df  | Sum Sq    | Mean Sq   | Sigma      | Percentage | Alter   | Pvalue |
| Between POP                  | 23  | 5423.733  | 235.81449 | 14.877835  | 28.88499   | less    | 0.001  |
| Between samples Within POP   | 145 | 4154.267  | 28.65012  | -7.979196  | -15.49143  | greater | 1      |
| Within samples               | 169 | 7538.839  | 44.60851  | 44.608512  | 86.60645   | greater | 0.001  |
| Total                        | 337 | 17116.839 | 50.79181  | 51.50715   | 100        |         |        |
| MCR90 3 populations          |     |           |           |            |            |         |        |
| Between POP                  | 2   | 1865.921  | 932.96036 | 8.1645148  | 15.204525  | less    | 0.001  |
| Between samples Within POP   | 166 | 7712.08   | 46.45831  | 0.9249003  | 1.722413   | greater | 0.126  |
| Within samples               | 169 | 7538.839  | 44.60851  | 44.608512  | 83.073061  | greater | 0.001  |
| Total                        | 337 | 17116.839 | 50.79181  | 53.6979271 | 100        |         |        |
| MCR90 4 populations          |     |           |           |            |            |         |        |
| Between POP                  | 3   | 2363.612  | 787.87082 | 9.0284928  | 16.9725958 | less    | 0.001  |
| Between samples Within POP   | 165 | 7214.388  | 43.72356  | -0.4424736 | -0.8318029 | greater | 0.684  |
| Within samples               | 169 | 7538.839  | 44.60851  | 44.608512  | 83.859207  | greater | 0.001  |
| Total                        | 337 | 17116.839 | 50.79181  | 53.1945312 | 100        |         |        |
| MCR90 diploid 24 populations |     |           |           |            |            |         |        |
| Between POP                  | 23  | 1506.979  | 65.52083  | 3.942773   | 21.54901   | less    | 0.429  |
| Between samples Within POP   | 145 | 1539.933  | 10.62022  | -3.733774  | -20.40674  | greater | 1      |
| Within samples               | 169 | 3056.834  | 18.08777  | 18.087773  | 98.85773   | greater | 0.001  |
| Total                        | 337 | 6103.745  | 18.112    | 18.296772  | 100        |         |        |

|                             |     |           |           |           |           |         |       |
|-----------------------------|-----|-----------|-----------|-----------|-----------|---------|-------|
| MCR90 diploid 3 populations | 2   | 493.3479  | 246.67397 | 2.130147  | 11.291234 | less    | 0.443 |
| Between POP                 | 166 | 2553.5637 | 15.38291  | -1.352429 | -7.168801 | greater | 1     |
| Between samples Within POP  | 169 | 3056.8336 | 18.08777  | 18.087773 | 95.877567 | greater | 0.001 |
| Within samples              | 337 | 6103.7452 | 18.112    | 18.86549  | 100       |         |       |
| Total                       |     |           |           |           |           |         |       |

|                             |     |           |           |           |           |         |       |
|-----------------------------|-----|-----------|-----------|-----------|-----------|---------|-------|
| MCR90 diploid 4 populations |     |           |           |           |           |         |       |
| Between POP                 | 3   | 612.4799  | 204.15998 | 2.297999  | 12.276322 | less    | 0.438 |
| Between samples Within POP  | 165 | 2434.4317 | 14.75413  | -1.666821 | -8.904455 | greater | 1     |
| Within samples              | 169 | 3056.8336 | 18.08777  | 18.087773 | 96.628133 | greater | 0.001 |
| Total                       | 337 | 6103.7452 | 18.112    | 18.718951 | 100       |         |       |

|                              |     |           |          |           |           |         |       |
|------------------------------|-----|-----------|----------|-----------|-----------|---------|-------|
| MCR90 diploid 24 populations |     |           |          |           |           |         |       |
| Between POP                  | 23  | 911.1029  | 39.61317 | 2.33995   | 20.60998  | less    | 0.072 |
| Between samples Within POP   | 145 | 1019.4748 | 7.03086  | -1.982671 | -17.46311 | greater | 1     |
| Within samples               | 169 | 1858.3582 | 10.9962  | 10.996202 | 96.85314  | greater | 0.001 |
| Total                        | 337 | 3788.9359 | 11.24313 | 11.353481 | 100       |         |       |

|                             |     |           |            |            |           |         |       |
|-----------------------------|-----|-----------|------------|------------|-----------|---------|-------|
| MCR90 diploid 3 populations |     |           |            |            |           |         |       |
| Between POP                 | 2   | 280.0636  | 140.031787 | 1.1980942  | 10.268537 | less    | 0.055 |
| Between samples Within POP  | 166 | 1650.5141 | 9.942856   | -0.5266732 | -4.513972 | greater | 1     |
| Within samples              | 169 | 1858.3582 | 10.996202  | 10.9962024 | 94.245434 | greater | 0.001 |
| Total                       | 337 | 3788.9359 | 11.243133  | 11.6676234 | 100       |         |       |

MCR90 diploid 4 populations

|                              |     |           |            |            |            |         |       |
|------------------------------|-----|-----------|------------|------------|------------|---------|-------|
| Between POP                  | 3   | 358.1321  | 119.377365 | 1.3327421  | 11.493288  | less    | 0.06  |
| Between samples Within POP   | 165 | 1572.4456 | 9.529973   | -0.7331146 | -6.322226  | greater | 1     |
| Within samples               | 169 | 1858.3582 | 10.996202  | 10.9962024 | 94.828938  | greater | 0.001 |
| Total                        | 337 | 3788.9359 | 11.243133  | 11.5958299 | 100        |         |       |
| MCR50 24 populations         |     |           |            |            |            |         |       |
| Between POP                  | 23  | 5423.733  | 235.81449  | 14.877835  | 28.88499   | less    | 0.001 |
| Between samples Within POP   | 145 | 4154.267  | 28.65012   | -7.979196  | -15.49143  | greater | 1     |
| Within samples               | 169 | 7538.839  | 44.60851   | 44.608512  | 86.60645   | greater | 0.001 |
| Total                        | 337 | 17116.839 | 50.79181   | 51.50715   | 100        |         |       |
| MCR50 3 populations          |     |           |            |            |            |         |       |
| Between POP                  | 2   | 1865.921  | 932.96036  | 8.1645148  | 15.204525  | less    | 0.001 |
| Between samples Within POP   | 166 | 7712.08   | 46.45831   | 0.9249003  | 1.722413   | greater | 0.125 |
| Within samples               | 169 | 7538.839  | 44.60851   | 44.608512  | 83.073061  | greater | 0.001 |
| Total                        | 337 | 17116.839 | 50.79181   | 53.6979271 | 100        |         |       |
| MCR50 2 populations          |     |           |            |            |            |         |       |
| Between POP                  | 3   | 2363.612  | 787.87082  | 9.0284928  | 16.9725958 | less    | 0.001 |
| Between samples Within POP   | 165 | 7214.388  | 43.72356   | -0.4424736 | -0.8318029 | greater | 0.649 |
| Within samples               | 169 | 7538.839  | 44.60851   | 44.608512  | 83.859207  | greater | 0.001 |
| Total                        | 337 | 17116.839 | 50.79181   | 53.1945312 | 100        |         |       |
| MCR50 diploid 24 populations |     |           |            |            |            |         |       |
| Between POP                  | 23  | 613.7878  | 26.686424  | 1.544482   | 19.48189   | less    | 0.01  |
| Between samples Within POP   | 145 | 751.1724  | 5.1805     | -1.2028    | -15.17196  | greater | 1     |

|                |     |           |          |          |          |         |       |
|----------------|-----|-----------|----------|----------|----------|---------|-------|
| Within samples | 169 | 1282.0507 | 7.586099 | 7.586099 | 95.69007 | greater | 0.001 |
| Total          | 337 | 2647.0109 | 7.854632 | 7.927781 | 100      |         |       |

MCR50 diploid 3 populations

|                            |     |           |           |            |           |         |       |
|----------------------------|-----|-----------|-----------|------------|-----------|---------|-------|
| Between POP                | 2   | 165.6171  | 82.808562 | 0.6961106  | 8.592219  | less    | 0.011 |
| Between samples Within POP | 166 | 1199.3431 | 7.224958  | -0.1805704 | -2.228813 | greater | 0.889 |
| Within samples             | 169 | 1282.0507 | 7.586099  | 7.5860991  | 93.636594 | greater | 0.001 |
| Total                      | 337 | 2647.0109 | 7.854632  | 8.1016393  | 100       |         |       |

MCR50 diploid 4 populations

|                            |     |           |           |            |           |         |       |
|----------------------------|-----|-----------|-----------|------------|-----------|---------|-------|
| Between POP                | 3   | 213.1698  | 71.056606 | 0.7774137  | 9.644449  | less    | 0.012 |
| Between samples Within POP | 165 | 1151.7904 | 6.980548  | -0.3027757 | -3.756179 | greater | 0.98  |
| Within samples             | 169 | 1282.0507 | 7.586099  | 7.5860991  | 94.11173  | greater | 0.001 |
| Total                      | 337 | 2647.0109 | 7.854632  | 8.0607371  | 100       |         |       |

MCR50 tetraploid 24 populations

|                            |     |          |           |           |           |         |       |
|----------------------------|-----|----------|-----------|-----------|-----------|---------|-------|
| Between POP                | 23  | 1313.55  | 57.110885 | 3.492225  | 22.64801  | less    | 0.685 |
| Between samples Within POP | 145 | 1230.162 | 8.483878  | -3.443463 | -22.33178 | greater | 1     |
| Within samples             | 169 | 2597.666 | 15.370805 | 15.370805 | 99.68377  | greater | 0.001 |
| Total                      | 337 | 5141.379 | 15.256316 | 15.419566 | 100       |         |       |

MCR50 tetraploid 3 populations

|                            |     |           |          |           |           |         |       |
|----------------------------|-----|-----------|----------|-----------|-----------|---------|-------|
| Between POP                | 2   | 460.9228  | 230.4614 | 2.006951  | 12.570298 | less    | 0.661 |
| Between samples Within POP | 166 | 2082.7899 | 12.54693 | -1.411939 | -8.843511 | greater | 1     |
| Within samples             | 169 | 2597.666  | 15.3708  | 15.370805 | 96.273213 | greater | 0.001 |
| Total                      | 337 | 5141.3786 | 15.25632 | 15.965816 | 100       |         |       |

MCR50 tetraploid 4 populations

|                            |     |           |           |           |           |         |       |
|----------------------------|-----|-----------|-----------|-----------|-----------|---------|-------|
| Between POP                | 3   | 580.4313  | 193.47711 | 2.203031  | 13.90998  | less    | 0.709 |
| Between samples Within POP | 165 | 1963.2813 | 11.89867  | -1.736065 | -10.96155 | greater | 1     |
| Within samples             | 169 | 2597.666  | 15.3708   | 15.370805 | 97.05157  | greater | 0.001 |
| Total                      | 337 | 5141.3786 | 15.25632  | 15.837771 | 100       |         |       |

Supplemental Table S2. K values for the MCR90 datasets for STRUCTURE and Maverick.

|                          | No admixture                         |            |                   | Admixture                            |            |                   | Maverick |
|--------------------------|--------------------------------------|------------|-------------------|--------------------------------------|------------|-------------------|----------|
|                          | STRUCTURE<br>(Evano et<br>al. (2005) | Ln Pr(X K) | StructureSelector | STRUCTURE<br>(Evano et<br>al. (2005) | Ln Pr(X K) | StructureSelector |          |
| MCR90                    | 18                                   | 20         | 8-10              | 3                                    | 9          | 9-10              | 2        |
| MCR90 diploid loci       | 12                                   | 16         | 8-10              | 2                                    | 10         | 6-8               | 1        |
| MCR90 tetraploid<br>loci | 4                                    | 23         | 8-10              | 3                                    | 10         | 8                 | 1        |
